# Supplementary material
Source: PubMed Central journal article supplement (PMC3018625)

## Supplemental Data

### Effect of Trifluoroethanol on $\text{Cu}^{2+}$ Conductivity and $\text{H}_2\text{O}_2$ Generation

Previously, we have demonstrated that the conformation of A $\beta$ 40 can be manipulated using trifluoroethanol (TFE) [18]. Since TFE was extensively used in this study, the effect of TFE on  $\text{Cu}^{2+}$  binding affinity and  $\text{H}_2\text{O}_2$  generation has to be evaluated before further studies. Figure S1(B) shows the plot of DCF intensity vs. TFE percentage. It can be seen that the DCF intensity was decreased with an increase of TFE percentage. The fluorescence intensity of DCF in 40% TFE is 47% decrease in comparison with that of DCF intensity in 5% TFE. There are three possible reasons for the decrease of DCF intensity with an increase of TFE percentage: 1) the DCF fluorescence may be quenched by TFE, 2) the formation of  $\text{H}_2\text{O}_2$  may be quenched by TFE, 3) the solubility of  $\text{Cu}^{2+}$  may be decreased. As shown in figure S1(C), the concentration of  $\text{H}_2\text{O}_2$ , which was determined by using UV/Vis absorption spectroscopy with an extinction coefficient  $\epsilon = 43.6 \text{ M}^{-1}$  at 240 nm, is basically kept at constant in different percentage of TFE, indicating that TFE does not further affect the formation or redox reaction of  $\text{H}_2\text{O}_2$ . Furthermore, the conductivity of 30  $\mu\text{M}$   $\text{Cu}^{2+}$  in 5% and 40% TFE is identical (data not shown), suggesting that TFE does not affect the solubility of  $\text{Cu}^{2+}$  ions and possibly the  $\text{Cu}^{2+}$ -binding to A $\beta$ 40. Therefore, the possible reason for the reduction of fluorescence intensity may be attributed to the quench of DCF fluorescence by TFE.

**Figure S1** (A) Free radical generation of  $\text{H}_2\text{O}_2$  under different composition of  $\text{Cu}^{2+}$ , TFE and  $\text{H}_2\text{O}_2$ . (B) The plot of DCF fluorescence intensity vs. TFE percentage. Basically, the intensity of DCF fluorescence is decreased with the increase of TFE content. In (C) The plot of  $\text{H}_2\text{O}_2$  level vs. TFE percentage as measured using absorption spectroscopy. The amount of  $\text{H}_2\text{O}_2$  was basically kept at constant for different percentage of TFE.

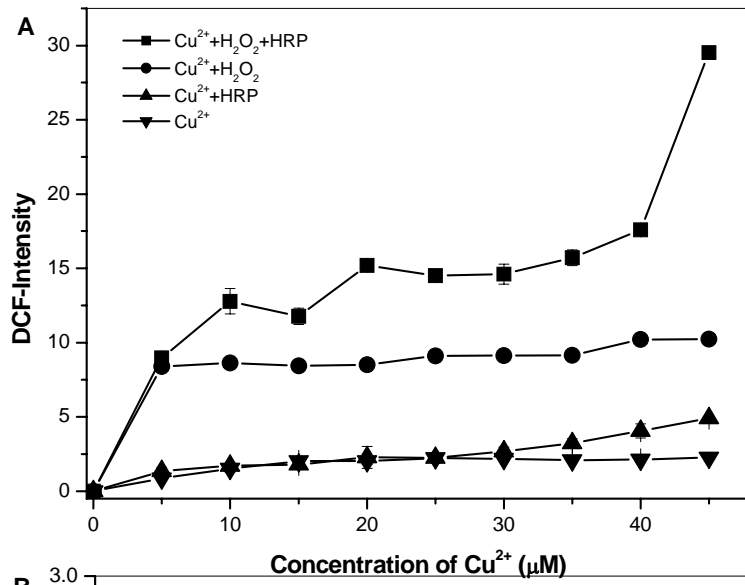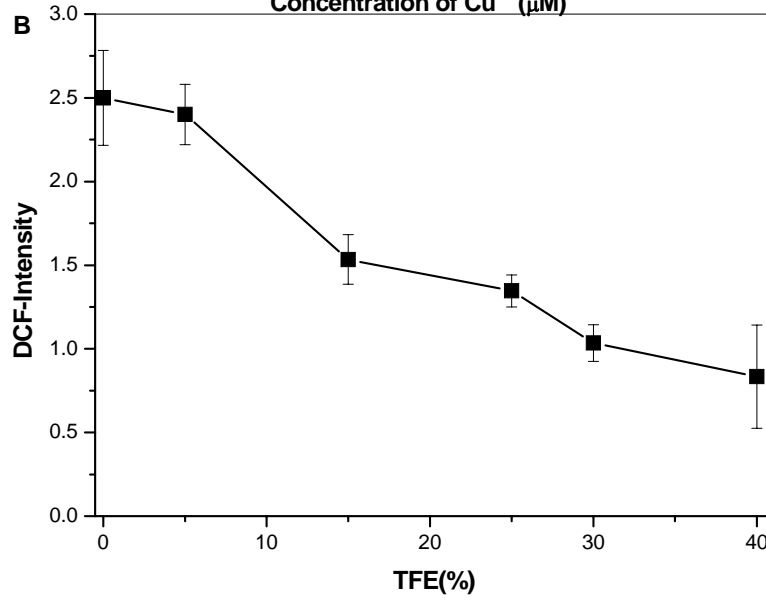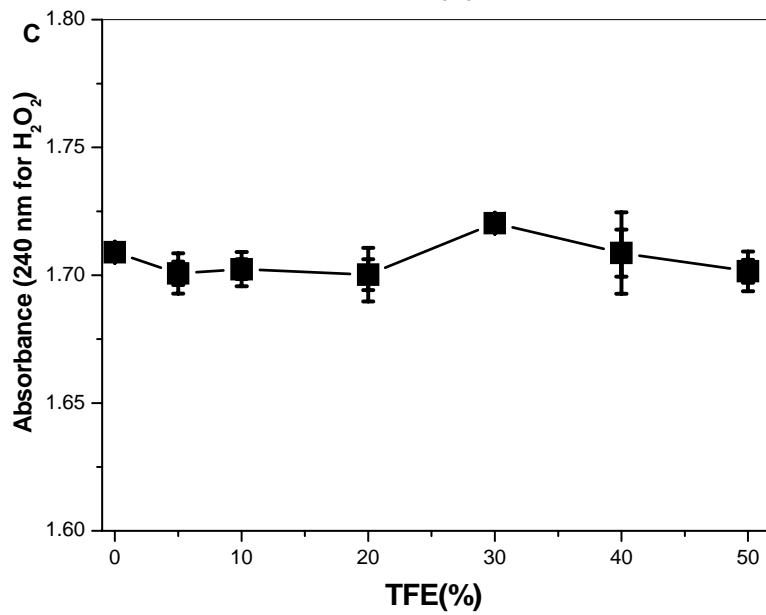

Supplement: 607861.f1.pdf [file 607861.f1.pdf]
